# Supplementary material for: Uncovering the role of Lewis and Brønsted acid sites in perforated SAPO-34 with an enhanced lifetime in methanol conversion to light olefins
Source: Royal Society of Chemistry journal article supplement (doi:10.1039/d3nj02514d), 2023-01-01
Supplement: d3nj02514d1.pdf [file d3nj02514d1.pdf]

# Uncovering the role of Lewis and Brønsted acid sites in perforated SAPO-34 with an enhanced lifetime in methanol conversion to light olefins

Mohammad Ghavipour<sup>a</sup>, Tiago J. Goncalves<sup>b</sup>, Ralph Al Hussami<sup>a</sup>, Ranjan Roy<sup>a</sup>, Samira Siahrostami<sup>b,\*</sup>, Jan Kopyscinski<sup>a,\*</sup>

<sup>a</sup> Department of Chemical Engineering, McGill University, 3610 University Street, Montreal, Quebec H3A 0C5, Canada

<sup>b</sup> Department of Chemistry, University of Calgary, 2500 University Drive, Calgary, Alberta T2N 1N4, Canada

\* To whom all correspondence should be addressed:

Tel.: +1 514 398 4276

[jan.kopyscinski@mcgill.ca](mailto:jan.kopyscinski@mcgill.ca)

[samira.siahrostami@ucalgary.ca](mailto:samira.siahrostami@ucalgary.ca)

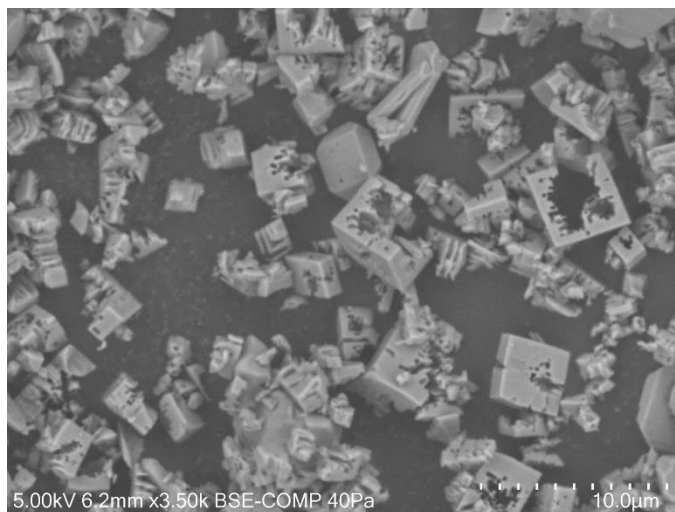

Fig. S1 SAPO-34 treatment by 0.5 molar DEA solution using magnetic bar stirrer for 24 h (the sample has crushed due to long treatment and mechanical mixing)

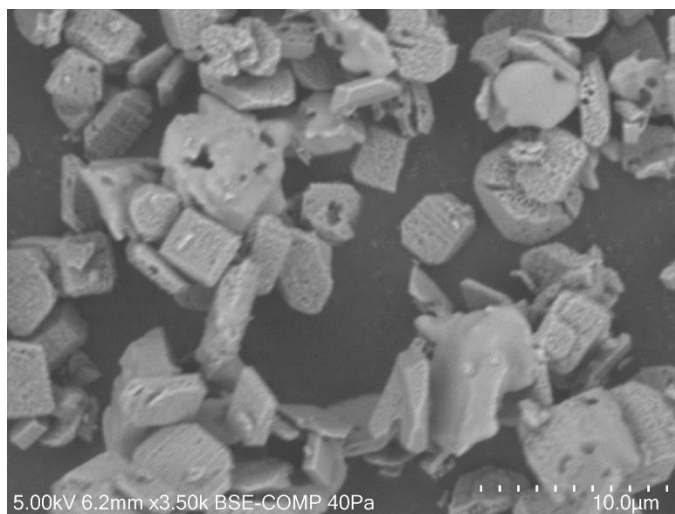

Fig. S2 SAPO-34 treatment by 10 molar DEA solution using an orbital shaker for 5 h (high DEA concentration has corroded the sample and created plate-shape particles along with amorphous phase)

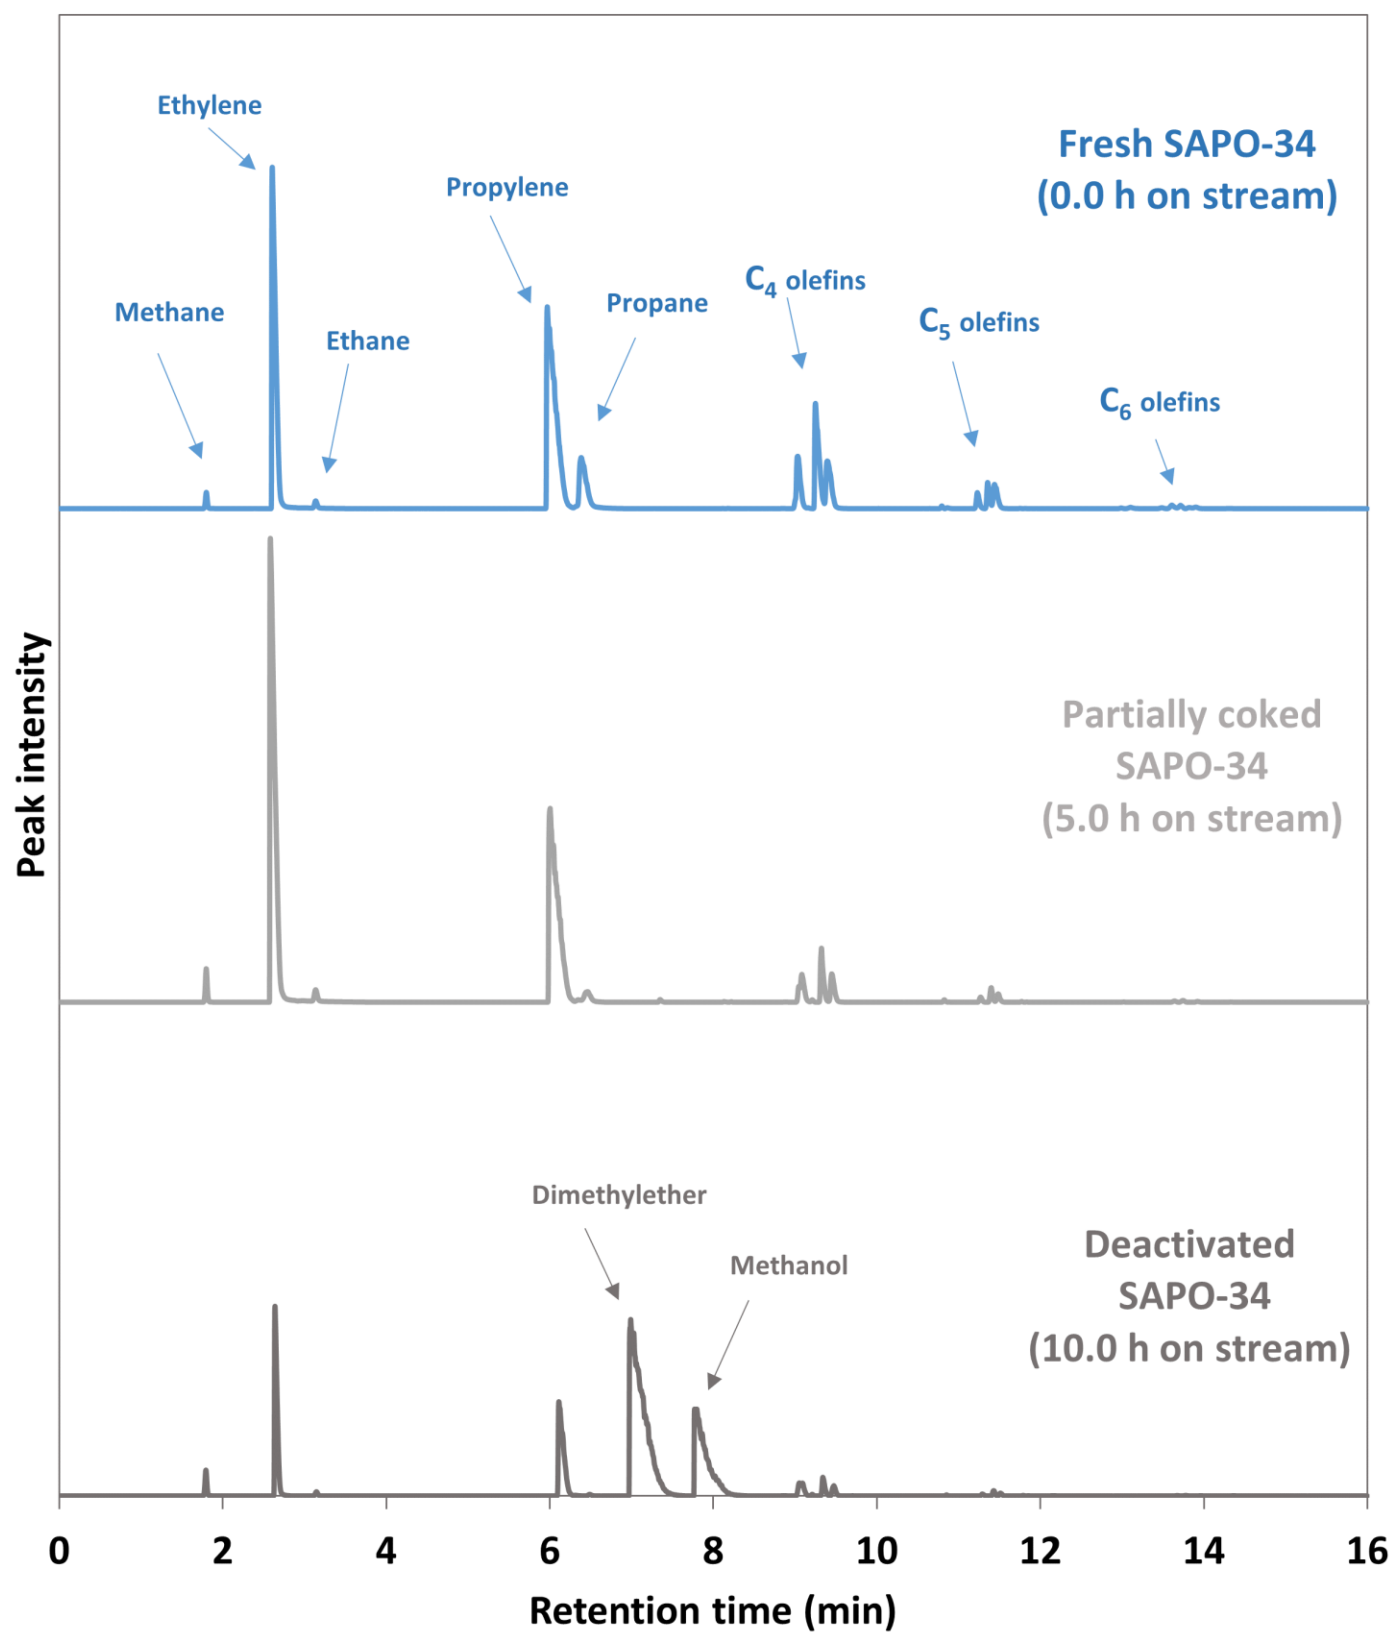

Fig. S3 GC chromatograms over parent SAPO-34 at different times on stream (over the fresh catalyst, partially coked catalyst-half lifetime, and after deactivation)

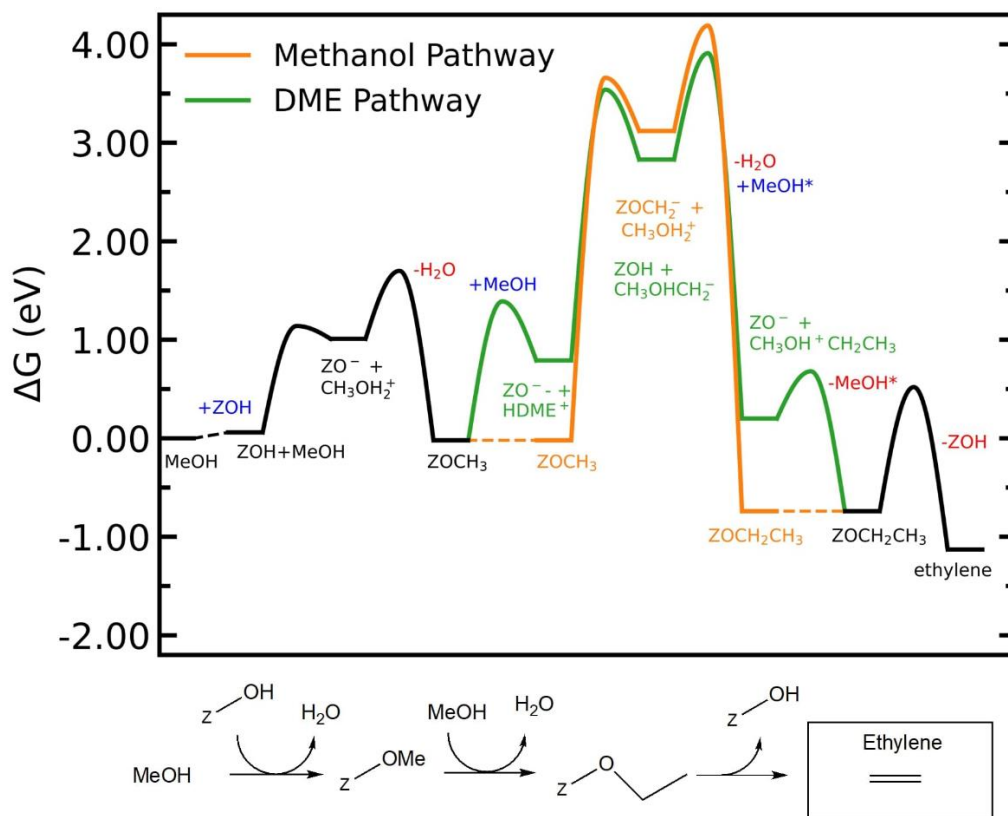

Fig. S4 Gibbs Free energy profile at 400 °C and 1 bar, for the catalytic formation of ethylene. Methanol pathway, depicted in orange, has protonated methanol ( $\text{CH}_3\text{OH}_2^+$ ) as an intermediate, whereas DME pathway has protonated DME ( $\text{H}^+$ -DME). Reactants are depicted in blue and products in red. Reactants and products labelled in the diagram correspond to both pathways except when marked with \*, which only correspond to reactants and products of the DME pathway, in green.

To assess the ability of BAS in catalyzing olefin formation, the possible reaction mechanisms of ethylene formation (the simplest olefin) were studied (Fig. S4) at 400 °C and a pressure of 1 bar through two routes: (1) MeOH insertion and protonation ( $\text{CH}_3\text{OH}_2^+$ , orange pathway) and (2) MeOH insertion and methylation ( $\text{H}^+$ -DME, green pathway). The Brønsted active site ZOH, corresponds to the zeolite framework (Z), that includes the Si-substituted site, followed by the neighboring oxygen, and added proton (OH). The active site then interacts with a methanol molecule (MeOH) by proton transfer, leading to the formation of a nucleophile ( $\text{ZO}^-$ ) that interacts with  $\text{CH}_3\text{OH}_2^+$  by donating an electron and cleaving the C-O bond, forming a methylated active site ( $\text{ZOCH}_3$ ) and water. In a similar way,  $\text{ZOCH}_3$  reacts with a second MeOH by either proton transfer (orange pathway) or methyl transfer ( $\text{H}^+$ -DME formation, in green). In the former, a proton from the zeolite-bound methyl is transferred to MeOH, eventually producing  $\text{ZOCH}_2\text{CH}_3$  and water, with a barrier of 3.6 eV, whereas in the latter,  $\text{CH}_3$  is transferred over to MeOH and then a proton is transferred back to the active site. An additional MeOH molecule will be necessary to form  $\text{ZOCH}_2\text{CH}_3$ , however, the barrier is decreased to 2.7 eV. The final reaction involves a concerted reaction step, where a proton from  $\text{CH}_3$  is transferred over to another neighboring zeolite-bound oxygen, while  $\text{CH}_2$  detaches from the zeolite forming ethylene that returns to the gas phase. Overall, it can be inferred that the DME pathway due to the lower value of the most energy-demanding step is preferred over the MeOH formation pathway.

Table S1. Summary of the previous modification methods on SAPO-34 catalyst and their activity performances

| Methanol Processing ability (g <sub>MeOH</sub> g <sub>Cat</sub> <sup>-1</sup> h <sup>-1</sup> )* | Catalyst Lifetime (min) | Template                               | Bulk Si content % (Si/Si+P+Al) | Gel formula Al <sub>2</sub> O <sub>3</sub> /P <sub>2</sub> O <sub>5</sub> /SiO <sub>2</sub> /T/H <sub>2</sub> O molar | Reaction Temperature (°C) | WHSV (g <sub>MeOH</sub> g <sub>Cat</sub> <sup>-1</sup> h <sup>-1</sup> ) | Feed dilution (mol%) | Employed technique                                                                          | Ref |        |       |                               |        |                                 |     |     |                      |                                                                                             |     |        |       |        |              |       |             |        |                    |              |     |                      |                                                                                             |                                                    |        |        |        |              |       |             |        |                    |                 |     |                      |                                                                                             |                                                    |        |        |        |              |       |            |             |                  |                    |     |                      |                                                                                             |                                                    |        |        |        |              |       |       |             |                  |                    |     |                    |                                                                                             |                                                                                             |       |        |       |        |       |       |             |        |                    |     |   |                    |                                                                                             |     |        |       |        |       |       |             |        |                    |     |   |                    |                                                                                             |     |       |       |        |       |       |            |        |                  |     |   |                    |                                                                                             |     |       |       |        |       |       |     |       |                  |     |
|--------------------------------------------------------------------------------------------------|-------------------------|----------------------------------------|--------------------------------|-----------------------------------------------------------------------------------------------------------------------|---------------------------|--------------------------------------------------------------------------|----------------------|---------------------------------------------------------------------------------------------|-----|--------|-------|-------------------------------|--------|---------------------------------|-----|-----|----------------------|---------------------------------------------------------------------------------------------|-----|--------|-------|--------|--------------|-------|-------------|--------|--------------------|--------------|-----|----------------------|---------------------------------------------------------------------------------------------|----------------------------------------------------|--------|--------|--------|--------------|-------|-------------|--------|--------------------|-----------------|-----|----------------------|---------------------------------------------------------------------------------------------|----------------------------------------------------|--------|--------|--------|--------------|-------|------------|-------------|------------------|--------------------|-----|----------------------|---------------------------------------------------------------------------------------------|----------------------------------------------------|--------|--------|--------|--------------|-------|-------|-------------|------------------|--------------------|-----|--------------------|---------------------------------------------------------------------------------------------|---------------------------------------------------------------------------------------------|-------|--------|-------|--------|-------|-------|-------------|--------|--------------------|-----|---|--------------------|---------------------------------------------------------------------------------------------|-----|--------|-------|--------|-------|-------|-------------|--------|--------------------|-----|---|--------------------|---------------------------------------------------------------------------------------------|-----|-------|-------|--------|-------|-------|------------|--------|------------------|-----|---|--------------------|---------------------------------------------------------------------------------------------|-----|-------|-------|--------|-------|-------|-----|-------|------------------|-----|
| 5.0 P                                                                                            | 150 P                   | TEAOH (seeds) TEA (secondary catalyst) | 16 P                           | 1/1.2/0.8/2/50<br>1/1/0/1.75/27.5                                                                                     | 400                       | 2                                                                        | 0                    | Nano sized catalyst using seed-assist method                                                | [1] |        |       |                               |        |                                 |     |     |                      |                                                                                             |     |        |       |        |              |       |             |        |                    |              |     |                      |                                                                                             |                                                    |        |        |        |              |       |             |        |                    |                 |     |                      |                                                                                             |                                                    |        |        |        |              |       |            |             |                  |                    |     |                      |                                                                                             |                                                    |        |        |        |              |       |       |             |                  |                    |     |                    |                                                                                             |                                                                                             |       |        |       |        |       |       |             |        |                    |     |   |                    |                                                                                             |     |        |       |        |       |       |             |        |                    |     |   |                    |                                                                                             |     |       |       |        |       |       |            |        |                  |     |   |                    |                                                                                             |     |       |       |        |       |       |     |       |                  |     |
| 20.0 T                                                                                           | 600 T                   |                                        | 10 T                           |                                                                                                                       |                           |                                                                          |                      |                                                                                             |     | 4.7 P  | 70 P  | DEA (initial)-TEA (secondary) | NA P   | 1/1/0.8/2/50<br>1/1/0/1.75/27.5 | 450 | 4   | H <sub>2</sub> O 60% | Using post-synthesis milling and recrystallization method                                   | [2] | 20.0 T | 300 T | 8.8 T  | NA           | NA P  | TEAOH       | NA P   | 1/1/0.3/1/3        | 400          | 1   | H <sub>2</sub> O 50% | Solvent-free hydrothermal synthesis, hierarchical porosity due to stacked nanocrystals      | [3]                                                | 15.0 T | 900 T  | 7.6 T  | 9.6 P        | 480 P | TEAOH       | 13 P   | 1/1/0.6/6/110      | 400             | 1.2 | 0                    | Nano sized catalyst using microwave                                                         | [4]                                                | 18.0 T | 900 T  | 5.6 T  | 11.3 P       | 150 P | TEAOH      | 17.9 P      | 0.5/1/0.3/2/70   | 450                | 4.5 | H <sub>2</sub> O 20% | Nano sized catalyst using Ultrasonic mixing                                                 | [5]                                                | 18.0 T | 240 T  | 19.1 T | 1/1/0.6/2/70 | 4.0 P | 120 P | Morph       | 18 P             | 1/1/0.6/3/80       | 400 | 2                  | 0                                                                                           | Hierarchical SAPO-34 using Organosilane surfactant                                          | [6]   | 16.7 T | 500 T | 16 T   | 8.0 P | 160 P | DEA         | NA P   | 1/1/0.5/2.3/150    | 450 | 3 | He 80%             | Hierarchical SAPO-34 using Organosilane surfactant                                          | [7] | 17.5 T | 350 T | 14.9 T | 2.2 P | 130 P | Morph-TEAOH | 12 P   | 1/1/0.6/1.5+0.5/60 | 470 | 1 | He 90%             | hierarchical SAPO-34 using carbon nano tubes                                                | [8] | 5.3 T | 320 T | 14 T   | 4.7 P | 140 P | Morpholine | 16.9 P | 1/1/0.8/2.1/57   | 400 | 2 | N <sub>2</sub> 70% | Hierarchical SAPO-34 using post-treatment with HF-NH <sub>4</sub> F mixed aqueous solutions | [9] | 3.3 T | 100 T | 16.1 T | 8.3 P | 250 P | TEA | 9.9 P | 1/1.1/0.4/4.7/70 | 400 |
| 4.7 P                                                                                            | 70 P                    | DEA (initial)-TEA (secondary)          | NA P                           | 1/1/0.8/2/50<br>1/1/0/1.75/27.5                                                                                       | 450                       | 4                                                                        | H <sub>2</sub> O 60% | Using post-synthesis milling and recrystallization method                                   | [2] |        |       |                               |        |                                 |     |     |                      |                                                                                             |     |        |       |        |              |       |             |        |                    |              |     |                      |                                                                                             |                                                    |        |        |        |              |       |             |        |                    |                 |     |                      |                                                                                             |                                                    |        |        |        |              |       |            |             |                  |                    |     |                      |                                                                                             |                                                    |        |        |        |              |       |       |             |                  |                    |     |                    |                                                                                             |                                                                                             |       |        |       |        |       |       |             |        |                    |     |   |                    |                                                                                             |     |        |       |        |       |       |             |        |                    |     |   |                    |                                                                                             |     |       |       |        |       |       |            |        |                  |     |   |                    |                                                                                             |     |       |       |        |       |       |     |       |                  |     |
| 20.0 T                                                                                           | 300 T                   |                                        | 8.8 T                          |                                                                                                                       |                           |                                                                          |                      |                                                                                             |     | NA     | NA P  | TEAOH                         | NA P   | 1/1/0.3/1/3                     | 400 | 1   | H <sub>2</sub> O 50% | Solvent-free hydrothermal synthesis, hierarchical porosity due to stacked nanocrystals      | [3] | 15.0 T | 900 T | 7.6 T  | 9.6 P        | 480 P | TEAOH       | 13 P   | 1/1/0.6/6/110      | 400          | 1.2 | 0                    | Nano sized catalyst using microwave                                                         | [4]                                                | 18.0 T | 900 T  | 5.6 T  | 11.3 P       | 150 P | TEAOH       | 17.9 P | 0.5/1/0.3/2/70     | 450             | 4.5 | H <sub>2</sub> O 20% | Nano sized catalyst using Ultrasonic mixing                                                 | [5]                                                | 18.0 T | 240 T  | 19.1 T | 1/1/0.6/2/70 | 4.0 P | 120 P      | Morph       | 18 P             | 1/1/0.6/3/80       | 400 | 2                    | 0                                                                                           | Hierarchical SAPO-34 using Organosilane surfactant | [6]    | 16.7 T | 500 T  | 16 T         | 8.0 P | 160 P | DEA         | NA P             | 1/1/0.5/2.3/150    | 450 | 3                  | He 80%                                                                                      | Hierarchical SAPO-34 using Organosilane surfactant                                          | [7]   | 17.5 T | 350 T | 14.9 T | 2.2 P | 130 P | Morph-TEAOH | 12 P   | 1/1/0.6/1.5+0.5/60 | 470 | 1 | He 90%             | hierarchical SAPO-34 using carbon nano tubes                                                | [8] | 5.3 T  | 320 T | 14 T   | 4.7 P | 140 P | Morpholine  | 16.9 P | 1/1/0.8/2.1/57     | 400 | 2 | N <sub>2</sub> 70% | Hierarchical SAPO-34 using post-treatment with HF-NH <sub>4</sub> F mixed aqueous solutions | [9] | 3.3 T | 100 T | 16.1 T | 8.3 P | 250 P | TEA        | 9.9 P  | 1/1.1/0.4/4.7/70 | 400 | 2 | N <sub>2</sub> 70% | Hierarchical SAPO-34 using post-treatment with HF-NH <sub>4</sub> F mixed aqueous solutions | [9] | 8.3 T | 250 T | 9.2 T  |       |       |     |       |                  |     |
| NA                                                                                               | NA P                    | TEAOH                                  | NA P                           | 1/1/0.3/1/3                                                                                                           | 400                       | 1                                                                        | H <sub>2</sub> O 50% | Solvent-free hydrothermal synthesis, hierarchical porosity due to stacked nanocrystals      | [3] |        |       |                               |        |                                 |     |     |                      |                                                                                             |     |        |       |        |              |       |             |        |                    |              |     |                      |                                                                                             |                                                    |        |        |        |              |       |             |        |                    |                 |     |                      |                                                                                             |                                                    |        |        |        |              |       |            |             |                  |                    |     |                      |                                                                                             |                                                    |        |        |        |              |       |       |             |                  |                    |     |                    |                                                                                             |                                                                                             |       |        |       |        |       |       |             |        |                    |     |   |                    |                                                                                             |     |        |       |        |       |       |             |        |                    |     |   |                    |                                                                                             |     |       |       |        |       |       |            |        |                  |     |   |                    |                                                                                             |     |       |       |        |       |       |     |       |                  |     |
| 15.0 T                                                                                           | 900 T                   |                                        | 7.6 T                          |                                                                                                                       |                           |                                                                          |                      |                                                                                             |     | 9.6 P  | 480 P | TEAOH                         | 13 P   | 1/1/0.6/6/110                   | 400 | 1.2 | 0                    | Nano sized catalyst using microwave                                                         | [4] | 18.0 T | 900 T | 5.6 T  | 11.3 P       | 150 P | TEAOH       | 17.9 P | 0.5/1/0.3/2/70     | 450          | 4.5 | H <sub>2</sub> O 20% | Nano sized catalyst using Ultrasonic mixing                                                 | [5]                                                | 18.0 T | 240 T  | 19.1 T | 1/1/0.6/2/70 | 4.0 P | 120 P       | Morph  | 18 P               | 1/1/0.6/3/80    | 400 | 2                    | 0                                                                                           | Hierarchical SAPO-34 using Organosilane surfactant | [6]    | 16.7 T | 500 T  | 16 T         | 8.0 P | 160 P      | DEA         | NA P             | 1/1/0.5/2.3/150    | 450 | 3                    | He 80%                                                                                      | Hierarchical SAPO-34 using Organosilane surfactant | [7]    | 17.5 T | 350 T  | 14.9 T       | 2.2 P | 130 P | Morph-TEAOH | 12 P             | 1/1/0.6/1.5+0.5/60 | 470 | 1                  | He 90%                                                                                      | hierarchical SAPO-34 using carbon nano tubes                                                | [8]   | 5.3 T  | 320 T | 14 T   | 4.7 P | 140 P | Morpholine  | 16.9 P | 1/1/0.8/2.1/57     | 400 | 2 | N <sub>2</sub> 70% | Hierarchical SAPO-34 using post-treatment with HF-NH <sub>4</sub> F mixed aqueous solutions | [9] | 3.3 T  | 100 T | 16.1 T | 8.3 P | 250 P | TEA         | 9.9 P  | 1/1.1/0.4/4.7/70   | 400 | 2 | N <sub>2</sub> 70% | Hierarchical SAPO-34 using post-treatment with HF-NH <sub>4</sub> F mixed aqueous solutions | [9] | 8.3 T | 250 T | 9.2 T  |       |       |            |        |                  |     |   |                    |                                                                                             |     |       |       |        |       |       |     |       |                  |     |
| 9.6 P                                                                                            | 480 P                   | TEAOH                                  | 13 P                           | 1/1/0.6/6/110                                                                                                         | 400                       | 1.2                                                                      | 0                    | Nano sized catalyst using microwave                                                         | [4] |        |       |                               |        |                                 |     |     |                      |                                                                                             |     |        |       |        |              |       |             |        |                    |              |     |                      |                                                                                             |                                                    |        |        |        |              |       |             |        |                    |                 |     |                      |                                                                                             |                                                    |        |        |        |              |       |            |             |                  |                    |     |                      |                                                                                             |                                                    |        |        |        |              |       |       |             |                  |                    |     |                    |                                                                                             |                                                                                             |       |        |       |        |       |       |             |        |                    |     |   |                    |                                                                                             |     |        |       |        |       |       |             |        |                    |     |   |                    |                                                                                             |     |       |       |        |       |       |            |        |                  |     |   |                    |                                                                                             |     |       |       |        |       |       |     |       |                  |     |
| 18.0 T                                                                                           | 900 T                   |                                        | 5.6 T                          |                                                                                                                       |                           |                                                                          |                      |                                                                                             |     | 11.3 P | 150 P | TEAOH                         | 17.9 P | 0.5/1/0.3/2/70                  | 450 | 4.5 | H <sub>2</sub> O 20% | Nano sized catalyst using Ultrasonic mixing                                                 | [5] | 18.0 T | 240 T | 19.1 T | 1/1/0.6/2/70 | 4.0 P | 120 P       | Morph  | 18 P               | 1/1/0.6/3/80 | 400 | 2                    | 0                                                                                           | Hierarchical SAPO-34 using Organosilane surfactant | [6]    | 16.7 T | 500 T  | 16 T         | 8.0 P | 160 P       | DEA    | NA P               | 1/1/0.5/2.3/150 | 450 | 3                    | He 80%                                                                                      | Hierarchical SAPO-34 using Organosilane surfactant | [7]    | 17.5 T | 350 T  | 14.9 T       | 2.2 P | 130 P      | Morph-TEAOH | 12 P             | 1/1/0.6/1.5+0.5/60 | 470 | 1                    | He 90%                                                                                      | hierarchical SAPO-34 using carbon nano tubes       | [8]    | 5.3 T  | 320 T  | 14 T         | 4.7 P | 140 P | Morpholine  | 16.9 P           | 1/1/0.8/2.1/57     | 400 | 2                  | N <sub>2</sub> 70%                                                                          | Hierarchical SAPO-34 using post-treatment with HF-NH <sub>4</sub> F mixed aqueous solutions | [9]   | 3.3 T  | 100 T | 16.1 T | 8.3 P | 250 P | TEA         | 9.9 P  | 1/1.1/0.4/4.7/70   | 400 | 2 | N <sub>2</sub> 70% | Hierarchical SAPO-34 using post-treatment with HF-NH <sub>4</sub> F mixed aqueous solutions | [9] | 8.3 T  | 250 T | 9.2 T  |       |       |             |        |                    |     |   |                    |                                                                                             |     |       |       |        |       |       |            |        |                  |     |   |                    |                                                                                             |     |       |       |        |       |       |     |       |                  |     |
| 11.3 P                                                                                           | 150 P                   | TEAOH                                  | 17.9 P                         | 0.5/1/0.3/2/70                                                                                                        | 450                       | 4.5                                                                      | H <sub>2</sub> O 20% | Nano sized catalyst using Ultrasonic mixing                                                 | [5] |        |       |                               |        |                                 |     |     |                      |                                                                                             |     |        |       |        |              |       |             |        |                    |              |     |                      |                                                                                             |                                                    |        |        |        |              |       |             |        |                    |                 |     |                      |                                                                                             |                                                    |        |        |        |              |       |            |             |                  |                    |     |                      |                                                                                             |                                                    |        |        |        |              |       |       |             |                  |                    |     |                    |                                                                                             |                                                                                             |       |        |       |        |       |       |             |        |                    |     |   |                    |                                                                                             |     |        |       |        |       |       |             |        |                    |     |   |                    |                                                                                             |     |       |       |        |       |       |            |        |                  |     |   |                    |                                                                                             |     |       |       |        |       |       |     |       |                  |     |
| 18.0 T                                                                                           | 240 T                   |                                        | 19.1 T                         | 1/1/0.6/2/70                                                                                                          |                           |                                                                          |                      |                                                                                             |     | 4.0 P  | 120 P | Morph                         | 18 P   | 1/1/0.6/3/80                    | 400 | 2   | 0                    | Hierarchical SAPO-34 using Organosilane surfactant                                          | [6] | 16.7 T | 500 T | 16 T   | 8.0 P        | 160 P | DEA         | NA P   | 1/1/0.5/2.3/150    | 450          | 3   | He 80%               | Hierarchical SAPO-34 using Organosilane surfactant                                          | [7]                                                | 17.5 T | 350 T  | 14.9 T | 2.2 P        | 130 P | Morph-TEAOH | 12 P   | 1/1/0.6/1.5+0.5/60 | 470             | 1   | He 90%               | hierarchical SAPO-34 using carbon nano tubes                                                | [8]                                                | 5.3 T  | 320 T  | 14 T   | 4.7 P        | 140 P | Morpholine | 16.9 P      | 1/1/0.8/2.1/57   | 400                | 2   | N <sub>2</sub> 70%   | Hierarchical SAPO-34 using post-treatment with HF-NH <sub>4</sub> F mixed aqueous solutions | [9]                                                | 3.3 T  | 100 T  | 16.1 T | 8.3 P        | 250 P | TEA   | 9.9 P       | 1/1.1/0.4/4.7/70 | 400                | 2   | N <sub>2</sub> 70% | Hierarchical SAPO-34 using post-treatment with HF-NH <sub>4</sub> F mixed aqueous solutions | [9]                                                                                         | 8.3 T | 250 T  | 9.2 T |        |       |       |             |        |                    |     |   |                    |                                                                                             |     |        |       |        |       |       |             |        |                    |     |   |                    |                                                                                             |     |       |       |        |       |       |            |        |                  |     |   |                    |                                                                                             |     |       |       |        |       |       |     |       |                  |     |
| 4.0 P                                                                                            | 120 P                   | Morph                                  | 18 P                           | 1/1/0.6/3/80                                                                                                          | 400                       | 2                                                                        | 0                    | Hierarchical SAPO-34 using Organosilane surfactant                                          | [6] |        |       |                               |        |                                 |     |     |                      |                                                                                             |     |        |       |        |              |       |             |        |                    |              |     |                      |                                                                                             |                                                    |        |        |        |              |       |             |        |                    |                 |     |                      |                                                                                             |                                                    |        |        |        |              |       |            |             |                  |                    |     |                      |                                                                                             |                                                    |        |        |        |              |       |       |             |                  |                    |     |                    |                                                                                             |                                                                                             |       |        |       |        |       |       |             |        |                    |     |   |                    |                                                                                             |     |        |       |        |       |       |             |        |                    |     |   |                    |                                                                                             |     |       |       |        |       |       |            |        |                  |     |   |                    |                                                                                             |     |       |       |        |       |       |     |       |                  |     |
| 16.7 T                                                                                           | 500 T                   |                                        | 16 T                           |                                                                                                                       |                           |                                                                          |                      |                                                                                             |     | 8.0 P  | 160 P | DEA                           | NA P   | 1/1/0.5/2.3/150                 | 450 | 3   | He 80%               | Hierarchical SAPO-34 using Organosilane surfactant                                          | [7] | 17.5 T | 350 T | 14.9 T | 2.2 P        | 130 P | Morph-TEAOH | 12 P   | 1/1/0.6/1.5+0.5/60 | 470          | 1   | He 90%               | hierarchical SAPO-34 using carbon nano tubes                                                | [8]                                                | 5.3 T  | 320 T  | 14 T   | 4.7 P        | 140 P | Morpholine  | 16.9 P | 1/1/0.8/2.1/57     | 400             | 2   | N <sub>2</sub> 70%   | Hierarchical SAPO-34 using post-treatment with HF-NH <sub>4</sub> F mixed aqueous solutions | [9]                                                | 3.3 T  | 100 T  | 16.1 T | 8.3 P        | 250 P | TEA        | 9.9 P       | 1/1.1/0.4/4.7/70 | 400                | 2   | N <sub>2</sub> 70%   | Hierarchical SAPO-34 using post-treatment with HF-NH <sub>4</sub> F mixed aqueous solutions | [9]                                                | 8.3 T  | 250 T  | 9.2 T  |              |       |       |             |                  |                    |     |                    |                                                                                             |                                                                                             |       |        |       |        |       |       |             |        |                    |     |   |                    |                                                                                             |     |        |       |        |       |       |             |        |                    |     |   |                    |                                                                                             |     |       |       |        |       |       |            |        |                  |     |   |                    |                                                                                             |     |       |       |        |       |       |     |       |                  |     |
| 8.0 P                                                                                            | 160 P                   | DEA                                    | NA P                           | 1/1/0.5/2.3/150                                                                                                       | 450                       | 3                                                                        | He 80%               | Hierarchical SAPO-34 using Organosilane surfactant                                          | [7] |        |       |                               |        |                                 |     |     |                      |                                                                                             |     |        |       |        |              |       |             |        |                    |              |     |                      |                                                                                             |                                                    |        |        |        |              |       |             |        |                    |                 |     |                      |                                                                                             |                                                    |        |        |        |              |       |            |             |                  |                    |     |                      |                                                                                             |                                                    |        |        |        |              |       |       |             |                  |                    |     |                    |                                                                                             |                                                                                             |       |        |       |        |       |       |             |        |                    |     |   |                    |                                                                                             |     |        |       |        |       |       |             |        |                    |     |   |                    |                                                                                             |     |       |       |        |       |       |            |        |                  |     |   |                    |                                                                                             |     |       |       |        |       |       |     |       |                  |     |
| 17.5 T                                                                                           | 350 T                   |                                        | 14.9 T                         |                                                                                                                       |                           |                                                                          |                      |                                                                                             |     | 2.2 P  | 130 P | Morph-TEAOH                   | 12 P   | 1/1/0.6/1.5+0.5/60              | 470 | 1   | He 90%               | hierarchical SAPO-34 using carbon nano tubes                                                | [8] | 5.3 T  | 320 T | 14 T   | 4.7 P        | 140 P | Morpholine  | 16.9 P | 1/1/0.8/2.1/57     | 400          | 2   | N <sub>2</sub> 70%   | Hierarchical SAPO-34 using post-treatment with HF-NH <sub>4</sub> F mixed aqueous solutions | [9]                                                | 3.3 T  | 100 T  | 16.1 T | 8.3 P        | 250 P | TEA         | 9.9 P  | 1/1.1/0.4/4.7/70   | 400             | 2   | N <sub>2</sub> 70%   | Hierarchical SAPO-34 using post-treatment with HF-NH <sub>4</sub> F mixed aqueous solutions | [9]                                                | 8.3 T  | 250 T  | 9.2 T  |              |       |            |             |                  |                    |     |                      |                                                                                             |                                                    |        |        |        |              |       |       |             |                  |                    |     |                    |                                                                                             |                                                                                             |       |        |       |        |       |       |             |        |                    |     |   |                    |                                                                                             |     |        |       |        |       |       |             |        |                    |     |   |                    |                                                                                             |     |       |       |        |       |       |            |        |                  |     |   |                    |                                                                                             |     |       |       |        |       |       |     |       |                  |     |
| 2.2 P                                                                                            | 130 P                   | Morph-TEAOH                            | 12 P                           | 1/1/0.6/1.5+0.5/60                                                                                                    | 470                       | 1                                                                        | He 90%               | hierarchical SAPO-34 using carbon nano tubes                                                | [8] |        |       |                               |        |                                 |     |     |                      |                                                                                             |     |        |       |        |              |       |             |        |                    |              |     |                      |                                                                                             |                                                    |        |        |        |              |       |             |        |                    |                 |     |                      |                                                                                             |                                                    |        |        |        |              |       |            |             |                  |                    |     |                      |                                                                                             |                                                    |        |        |        |              |       |       |             |                  |                    |     |                    |                                                                                             |                                                                                             |       |        |       |        |       |       |             |        |                    |     |   |                    |                                                                                             |     |        |       |        |       |       |             |        |                    |     |   |                    |                                                                                             |     |       |       |        |       |       |            |        |                  |     |   |                    |                                                                                             |     |       |       |        |       |       |     |       |                  |     |
| 5.3 T                                                                                            | 320 T                   |                                        | 14 T                           |                                                                                                                       |                           |                                                                          |                      |                                                                                             |     | 4.7 P  | 140 P | Morpholine                    | 16.9 P | 1/1/0.8/2.1/57                  | 400 | 2   | N <sub>2</sub> 70%   | Hierarchical SAPO-34 using post-treatment with HF-NH <sub>4</sub> F mixed aqueous solutions | [9] | 3.3 T  | 100 T | 16.1 T | 8.3 P        | 250 P | TEA         | 9.9 P  | 1/1.1/0.4/4.7/70   | 400          | 2   | N <sub>2</sub> 70%   | Hierarchical SAPO-34 using post-treatment with HF-NH <sub>4</sub> F mixed aqueous solutions | [9]                                                | 8.3 T  | 250 T  | 9.2 T  |              |       |             |        |                    |                 |     |                      |                                                                                             |                                                    |        |        |        |              |       |            |             |                  |                    |     |                      |                                                                                             |                                                    |        |        |        |              |       |       |             |                  |                    |     |                    |                                                                                             |                                                                                             |       |        |       |        |       |       |             |        |                    |     |   |                    |                                                                                             |     |        |       |        |       |       |             |        |                    |     |   |                    |                                                                                             |     |       |       |        |       |       |            |        |                  |     |   |                    |                                                                                             |     |       |       |        |       |       |     |       |                  |     |
| 4.7 P                                                                                            | 140 P                   | Morpholine                             | 16.9 P                         | 1/1/0.8/2.1/57                                                                                                        | 400                       | 2                                                                        | N <sub>2</sub> 70%   | Hierarchical SAPO-34 using post-treatment with HF-NH <sub>4</sub> F mixed aqueous solutions | [9] |        |       |                               |        |                                 |     |     |                      |                                                                                             |     |        |       |        |              |       |             |        |                    |              |     |                      |                                                                                             |                                                    |        |        |        |              |       |             |        |                    |                 |     |                      |                                                                                             |                                                    |        |        |        |              |       |            |             |                  |                    |     |                      |                                                                                             |                                                    |        |        |        |              |       |       |             |                  |                    |     |                    |                                                                                             |                                                                                             |       |        |       |        |       |       |             |        |                    |     |   |                    |                                                                                             |     |        |       |        |       |       |             |        |                    |     |   |                    |                                                                                             |     |       |       |        |       |       |            |        |                  |     |   |                    |                                                                                             |     |       |       |        |       |       |     |       |                  |     |
| 3.3 T                                                                                            | 100 T                   |                                        | 16.1 T                         |                                                                                                                       |                           |                                                                          |                      |                                                                                             |     | 8.3 P  | 250 P | TEA                           | 9.9 P  | 1/1.1/0.4/4.7/70                | 400 | 2   | N <sub>2</sub> 70%   | Hierarchical SAPO-34 using post-treatment with HF-NH <sub>4</sub> F mixed aqueous solutions | [9] | 8.3 T  | 250 T | 9.2 T  |              |       |             |        |                    |              |     |                      |                                                                                             |                                                    |        |        |        |              |       |             |        |                    |                 |     |                      |                                                                                             |                                                    |        |        |        |              |       |            |             |                  |                    |     |                      |                                                                                             |                                                    |        |        |        |              |       |       |             |                  |                    |     |                    |                                                                                             |                                                                                             |       |        |       |        |       |       |             |        |                    |     |   |                    |                                                                                             |     |        |       |        |       |       |             |        |                    |     |   |                    |                                                                                             |     |       |       |        |       |       |            |        |                  |     |   |                    |                                                                                             |     |       |       |        |       |       |     |       |                  |     |
| 8.3 P                                                                                            | 250 P                   | TEA                                    | 9.9 P                          | 1/1.1/0.4/4.7/70                                                                                                      | 400                       | 2                                                                        | N <sub>2</sub> 70%   | Hierarchical SAPO-34 using post-treatment with HF-NH <sub>4</sub> F mixed aqueous solutions | [9] |        |       |                               |        |                                 |     |     |                      |                                                                                             |     |        |       |        |              |       |             |        |                    |              |     |                      |                                                                                             |                                                    |        |        |        |              |       |             |        |                    |                 |     |                      |                                                                                             |                                                    |        |        |        |              |       |            |             |                  |                    |     |                      |                                                                                             |                                                    |        |        |        |              |       |       |             |                  |                    |     |                    |                                                                                             |                                                                                             |       |        |       |        |       |       |             |        |                    |     |   |                    |                                                                                             |     |        |       |        |       |       |             |        |                    |     |   |                    |                                                                                             |     |       |       |        |       |       |            |        |                  |     |   |                    |                                                                                             |     |       |       |        |       |       |     |       |                  |     |
| 8.3 T                                                                                            | 250 T                   |                                        | 9.2 T                          |                                                                                                                       |                           |                                                                          |                      |                                                                                             |     |        |       |                               |        |                                 |     |     |                      |                                                                                             |     |        |       |        |              |       |             |        |                    |              |     |                      |                                                                                             |                                                    |        |        |        |              |       |             |        |                    |                 |     |                      |                                                                                             |                                                    |        |        |        |              |       |            |             |                  |                    |     |                      |                                                                                             |                                                    |        |        |        |              |       |       |             |                  |                    |     |                    |                                                                                             |                                                                                             |       |        |       |        |       |       |             |        |                    |     |   |                    |                                                                                             |     |        |       |        |       |       |             |        |                    |     |   |                    |                                                                                             |     |       |       |        |       |       |            |        |                  |     |   |                    |                                                                                             |     |       |       |        |       |       |     |       |                  |     |

Table S1 Continue. Summary of the previous modification methods on SAPO-34 catalyst and their activity performances

| Methanol Processing ability (g <sub>MeOH</sub> g <sub>Cat</sub> <sup>-1</sup> )* | Catalyst Lifetime (min) | Template  | Bulk Si content % (Si/Si+P+Al) | Gel formula Al <sub>2</sub> O <sub>3</sub> /P <sub>2</sub> O <sub>5</sub> /SiO <sub>2</sub> /T/H <sub>2</sub> O molar | Reaction Temperature (°C) | WHSV (g <sub>MeOH</sub> g <sub>Cat</sub> <sup>-1</sup> h <sup>-1</sup> ) | Feed dilution (mol%) | Employed technique                                                                          | Ref        |        |       |           |        |                                                   |     |     |                      |                                                                    |            |        |       |        |        |       |           |              |                                                   |     |                    |                                                                      |                                         |            |        |       |        |        |       |           |                |                                                   |     |                      |                                                                      |                                         |            |        |       |        |       |       |           |                |                                                   |     |                      |                                                                      |                                         |       |        |       |       |       |       |        |                |              |     |                      |                                                                      |                                         |       |        |        |       |       |       |        |                |     |     |                      |                                                                      |            |       |       |        |       |       |       |        |                |     |   |                      |                                    |            |       |       |        |       |       |       |        |              |     |   |                     |                                    |            |       |       |        |       |       |       |        |              |     |
|----------------------------------------------------------------------------------|-------------------------|-----------|--------------------------------|-----------------------------------------------------------------------------------------------------------------------|---------------------------|--------------------------------------------------------------------------|----------------------|---------------------------------------------------------------------------------------------|------------|--------|-------|-----------|--------|---------------------------------------------------|-----|-----|----------------------|--------------------------------------------------------------------|------------|--------|-------|--------|--------|-------|-----------|--------------|---------------------------------------------------|-----|--------------------|----------------------------------------------------------------------|-----------------------------------------|------------|--------|-------|--------|--------|-------|-----------|----------------|---------------------------------------------------|-----|----------------------|----------------------------------------------------------------------|-----------------------------------------|------------|--------|-------|--------|-------|-------|-----------|----------------|---------------------------------------------------|-----|----------------------|----------------------------------------------------------------------|-----------------------------------------|-------|--------|-------|-------|-------|-------|--------|----------------|--------------|-----|----------------------|----------------------------------------------------------------------|-----------------------------------------|-------|--------|--------|-------|-------|-------|--------|----------------|-----|-----|----------------------|----------------------------------------------------------------------|------------|-------|-------|--------|-------|-------|-------|--------|----------------|-----|---|----------------------|------------------------------------|------------|-------|-------|--------|-------|-------|-------|--------|--------------|-----|---|---------------------|------------------------------------|------------|-------|-------|--------|-------|-------|-------|--------|--------------|-----|
| 25.0 P                                                                           | 375 P                   | TEAOH     | 10.1 P                         | 1/2/1/4/138.8                                                                                                         | 450                       | 4                                                                        | N <sub>2</sub> 50%   | Hierarchical SAPO-34 using post-treatment with HF-NH <sub>4</sub> F mixed aqueous solutions | [9]        |        |       |           |        |                                                   |     |     |                      |                                                                    |            |        |       |        |        |       |           |              |                                                   |     |                    |                                                                      |                                         |            |        |       |        |        |       |           |                |                                                   |     |                      |                                                                      |                                         |            |        |       |        |       |       |           |                |                                                   |     |                      |                                                                      |                                         |       |        |       |       |       |       |        |                |              |     |                      |                                                                      |                                         |       |        |        |       |       |       |        |                |     |     |                      |                                                                      |            |       |       |        |       |       |       |        |                |     |   |                      |                                    |            |       |       |        |       |       |       |        |              |     |   |                     |                                    |            |       |       |        |       |       |       |        |              |     |
| 16.7 T                                                                           | 250 T                   |           | 5.9 T                          |                                                                                                                       |                           |                                                                          |                      |                                                                                             |            | 4.7 P  | 140 P | TEA       | 8.6 P  | 1/1/0.4/3.5/105                                   | 450 | 2   | H <sub>2</sub> O 50% | Introducing ordered mesoporous structures using NaHCO <sub>3</sub> | [10]       | 7.7 T  | 230 T | 8.6 T  | 6.7 P  | 200 P | TEAOH     | 11 P         | 1/2/0.6/4/140                                     | 400 | 2                  | N <sub>2</sub> 70%                                                   | Nano sized catalyst using microwave     | [11]       | 28.3 T | 850 T | 12 T   | 10.8 P | 540 P | TEAOH     | 13 P           | 1/1/0.6/6/110                                     | 400 | 1.2                  | N <sub>2</sub> 50%                                                   | Nano sized catalyst using microwave     | [12]       | 15.6 T | 780 T | 5.7 T  | 6.0 P | 180 P | TEAOH/TEA | 16 P           | 1/1.2/0.6/2/40 seed<br>1/1/0.4/4.7/70 outer layer | 400 | 2                    | NA                                                                   | Nano sized catalyst using seeding       | [13]  | 21.7 T | 650 T | 10 T  | 6.7 P | 100 P | TEAOH  | NA             | 1/1/0.5/2/65 | 400 | 4                    | N <sub>2</sub> 90%                                                   | Hierarchical SAPO-34 using Organosilane | [14]  | 16.7 T | 250 T  | 6.0 P | 300 P | TEAOH | 21 P   | 1/1/0.6/2/40   | 400 | 1.2 | N <sub>2</sub> 50%   | Hierarchical SAPO-34 using hexadecyltrimethylammonium bromide (CTAB) | [15]       | 8.4 T | 420 T | 20 T   | 4.0 P | 120 P | TEA   | 9 P    | 1/1/0.33/4/100 | 450 | 2 | 50% H <sub>2</sub> O | Base-etching post treatment        | [16]       | 7.3 T | 220 T | 9 T    | 3.0 P | 180 P | TEA   | 9 P    | 1/1/0.4/3/50 | 400 | 1 | 5% H <sub>2</sub> O | Citric acid-etching post treatment | [17]       | 7.5 T | 450 T | 11 T   | 6.7 P | 400 P | TEAOH | 15.1 P | 1/1/0.4/2/70 | 400 |
| 4.7 P                                                                            | 140 P                   | TEA       | 8.6 P                          | 1/1/0.4/3.5/105                                                                                                       | 450                       | 2                                                                        | H <sub>2</sub> O 50% | Introducing ordered mesoporous structures using NaHCO <sub>3</sub>                          | [10]       |        |       |           |        |                                                   |     |     |                      |                                                                    |            |        |       |        |        |       |           |              |                                                   |     |                    |                                                                      |                                         |            |        |       |        |        |       |           |                |                                                   |     |                      |                                                                      |                                         |            |        |       |        |       |       |           |                |                                                   |     |                      |                                                                      |                                         |       |        |       |       |       |       |        |                |              |     |                      |                                                                      |                                         |       |        |        |       |       |       |        |                |     |     |                      |                                                                      |            |       |       |        |       |       |       |        |                |     |   |                      |                                    |            |       |       |        |       |       |       |        |              |     |   |                     |                                    |            |       |       |        |       |       |       |        |              |     |
| 7.7 T                                                                            | 230 T                   |           | 8.6 T                          |                                                                                                                       |                           |                                                                          |                      |                                                                                             |            | 6.7 P  | 200 P | TEAOH     | 11 P   | 1/2/0.6/4/140                                     | 400 | 2   | N <sub>2</sub> 70%   | Nano sized catalyst using microwave                                | [11]       | 28.3 T | 850 T | 12 T   | 10.8 P | 540 P | TEAOH     | 13 P         | 1/1/0.6/6/110                                     | 400 | 1.2                | N <sub>2</sub> 50%                                                   | Nano sized catalyst using microwave     | [12]       | 15.6 T | 780 T | 5.7 T  | 6.0 P  | 180 P | TEAOH/TEA | 16 P           | 1/1.2/0.6/2/40 seed<br>1/1/0.4/4.7/70 outer layer | 400 | 2                    | NA                                                                   | Nano sized catalyst using seeding       | [13]       | 21.7 T | 650 T | 10 T   | 6.7 P | 100 P | TEAOH     | NA             | 1/1/0.5/2/65                                      | 400 | 4                    | N <sub>2</sub> 90%                                                   | Hierarchical SAPO-34 using Organosilane | [14]  | 16.7 T | 250 T | 6.0 P | 300 P | TEAOH | 21 P   | 1/1/0.6/2/40   | 400          | 1.2 | N <sub>2</sub> 50%   | Hierarchical SAPO-34 using hexadecyltrimethylammonium bromide (CTAB) | [15]                                    | 8.4 T | 420 T  | 20 T   | 4.0 P | 120 P | TEA   | 9 P    | 1/1/0.33/4/100 | 450 | 2   | 50% H <sub>2</sub> O | Base-etching post treatment                                          | [16]       | 7.3 T | 220 T | 9 T    | 3.0 P | 180 P | TEA   | 9 P    | 1/1/0.4/3/50   | 400 | 1 | 5% H <sub>2</sub> O  | Citric acid-etching post treatment | [17]       | 7.5 T | 450 T | 11 T   | 6.7 P | 400 P | TEAOH | 15.1 P | 1/1/0.4/2/70 | 400 | 1 | 70% Ar              | Alkali-etching post treatment      | This study | 9.9 T | 595 T | 14.1 T |       |       |       |        |              |     |
| 6.7 P                                                                            | 200 P                   | TEAOH     | 11 P                           | 1/2/0.6/4/140                                                                                                         | 400                       | 2                                                                        | N <sub>2</sub> 70%   | Nano sized catalyst using microwave                                                         | [11]       |        |       |           |        |                                                   |     |     |                      |                                                                    |            |        |       |        |        |       |           |              |                                                   |     |                    |                                                                      |                                         |            |        |       |        |        |       |           |                |                                                   |     |                      |                                                                      |                                         |            |        |       |        |       |       |           |                |                                                   |     |                      |                                                                      |                                         |       |        |       |       |       |       |        |                |              |     |                      |                                                                      |                                         |       |        |        |       |       |       |        |                |     |     |                      |                                                                      |            |       |       |        |       |       |       |        |                |     |   |                      |                                    |            |       |       |        |       |       |       |        |              |     |   |                     |                                    |            |       |       |        |       |       |       |        |              |     |
| 28.3 T                                                                           | 850 T                   |           | 12 T                           |                                                                                                                       |                           |                                                                          |                      |                                                                                             |            | 10.8 P | 540 P | TEAOH     | 13 P   | 1/1/0.6/6/110                                     | 400 | 1.2 | N <sub>2</sub> 50%   | Nano sized catalyst using microwave                                | [12]       | 15.6 T | 780 T | 5.7 T  | 6.0 P  | 180 P | TEAOH/TEA | 16 P         | 1/1.2/0.6/2/40 seed<br>1/1/0.4/4.7/70 outer layer | 400 | 2                  | NA                                                                   | Nano sized catalyst using seeding       | [13]       | 21.7 T | 650 T | 10 T   | 6.7 P  | 100 P | TEAOH     | NA             | 1/1/0.5/2/65                                      | 400 | 4                    | N <sub>2</sub> 90%                                                   | Hierarchical SAPO-34 using Organosilane | [14]       | 16.7 T | 250 T | 6.0 P  | 300 P | TEAOH | 21 P      | 1/1/0.6/2/40   | 400                                               | 1.2 | N <sub>2</sub> 50%   | Hierarchical SAPO-34 using hexadecyltrimethylammonium bromide (CTAB) | [15]                                    | 8.4 T | 420 T  | 20 T  | 4.0 P | 120 P | TEA   | 9 P    | 1/1/0.33/4/100 | 450          | 2   | 50% H <sub>2</sub> O | Base-etching post treatment                                          | [16]                                    | 7.3 T | 220 T  | 9 T    | 3.0 P | 180 P | TEA   | 9 P    | 1/1/0.4/3/50   | 400 | 1   | 5% H <sub>2</sub> O  | Citric acid-etching post treatment                                   | [17]       | 7.5 T | 450 T | 11 T   | 6.7 P | 400 P | TEAOH | 15.1 P | 1/1/0.4/2/70   | 400 | 1 | 70% Ar               | Alkali-etching post treatment      | This study | 9.9 T | 595 T | 14.1 T |       |       |       |        |              |     |   |                     |                                    |            |       |       |        |       |       |       |        |              |     |
| 10.8 P                                                                           | 540 P                   | TEAOH     | 13 P                           | 1/1/0.6/6/110                                                                                                         | 400                       | 1.2                                                                      | N <sub>2</sub> 50%   | Nano sized catalyst using microwave                                                         | [12]       |        |       |           |        |                                                   |     |     |                      |                                                                    |            |        |       |        |        |       |           |              |                                                   |     |                    |                                                                      |                                         |            |        |       |        |        |       |           |                |                                                   |     |                      |                                                                      |                                         |            |        |       |        |       |       |           |                |                                                   |     |                      |                                                                      |                                         |       |        |       |       |       |       |        |                |              |     |                      |                                                                      |                                         |       |        |        |       |       |       |        |                |     |     |                      |                                                                      |            |       |       |        |       |       |       |        |                |     |   |                      |                                    |            |       |       |        |       |       |       |        |              |     |   |                     |                                    |            |       |       |        |       |       |       |        |              |     |
| 15.6 T                                                                           | 780 T                   |           | 5.7 T                          |                                                                                                                       |                           |                                                                          |                      |                                                                                             |            | 6.0 P  | 180 P | TEAOH/TEA | 16 P   | 1/1.2/0.6/2/40 seed<br>1/1/0.4/4.7/70 outer layer | 400 | 2   | NA                   | Nano sized catalyst using seeding                                  | [13]       | 21.7 T | 650 T | 10 T   | 6.7 P  | 100 P | TEAOH     | NA           | 1/1/0.5/2/65                                      | 400 | 4                  | N <sub>2</sub> 90%                                                   | Hierarchical SAPO-34 using Organosilane | [14]       | 16.7 T | 250 T | 6.0 P  | 300 P  | TEAOH | 21 P      | 1/1/0.6/2/40   | 400                                               | 1.2 | N <sub>2</sub> 50%   | Hierarchical SAPO-34 using hexadecyltrimethylammonium bromide (CTAB) | [15]                                    | 8.4 T      | 420 T  | 20 T  | 4.0 P  | 120 P | TEA   | 9 P       | 1/1/0.33/4/100 | 450                                               | 2   | 50% H <sub>2</sub> O | Base-etching post treatment                                          | [16]                                    | 7.3 T | 220 T  | 9 T   | 3.0 P | 180 P | TEA   | 9 P    | 1/1/0.4/3/50   | 400          | 1   | 5% H <sub>2</sub> O  | Citric acid-etching post treatment                                   | [17]                                    | 7.5 T | 450 T  | 11 T   | 6.7 P | 400 P | TEAOH | 15.1 P | 1/1/0.4/2/70   | 400 | 1   | 70% Ar               | Alkali-etching post treatment                                        | This study | 9.9 T | 595 T | 14.1 T |       |       |       |        |                |     |   |                      |                                    |            |       |       |        |       |       |       |        |              |     |   |                     |                                    |            |       |       |        |       |       |       |        |              |     |
| 6.0 P                                                                            | 180 P                   | TEAOH/TEA | 16 P                           | 1/1.2/0.6/2/40 seed<br>1/1/0.4/4.7/70 outer layer                                                                     | 400                       | 2                                                                        | NA                   | Nano sized catalyst using seeding                                                           | [13]       |        |       |           |        |                                                   |     |     |                      |                                                                    |            |        |       |        |        |       |           |              |                                                   |     |                    |                                                                      |                                         |            |        |       |        |        |       |           |                |                                                   |     |                      |                                                                      |                                         |            |        |       |        |       |       |           |                |                                                   |     |                      |                                                                      |                                         |       |        |       |       |       |       |        |                |              |     |                      |                                                                      |                                         |       |        |        |       |       |       |        |                |     |     |                      |                                                                      |            |       |       |        |       |       |       |        |                |     |   |                      |                                    |            |       |       |        |       |       |       |        |              |     |   |                     |                                    |            |       |       |        |       |       |       |        |              |     |
| 21.7 T                                                                           | 650 T                   |           | 10 T                           |                                                                                                                       |                           |                                                                          |                      |                                                                                             |            | 6.7 P  | 100 P | TEAOH     | NA     | 1/1/0.5/2/65                                      | 400 | 4   | N <sub>2</sub> 90%   | Hierarchical SAPO-34 using Organosilane                            | [14]       | 16.7 T | 250 T | 6.0 P  | 300 P  | TEAOH | 21 P      | 1/1/0.6/2/40 | 400                                               | 1.2 | N <sub>2</sub> 50% | Hierarchical SAPO-34 using hexadecyltrimethylammonium bromide (CTAB) | [15]                                    | 8.4 T      | 420 T  | 20 T  | 4.0 P  | 120 P  | TEA   | 9 P       | 1/1/0.33/4/100 | 450                                               | 2   | 50% H <sub>2</sub> O | Base-etching post treatment                                          | [16]                                    | 7.3 T      | 220 T  | 9 T   | 3.0 P  | 180 P | TEA   | 9 P       | 1/1/0.4/3/50   | 400                                               | 1   | 5% H <sub>2</sub> O  | Citric acid-etching post treatment                                   | [17]                                    | 7.5 T | 450 T  | 11 T  | 6.7 P | 400 P | TEAOH | 15.1 P | 1/1/0.4/2/70   | 400          | 1   | 70% Ar               | Alkali-etching post treatment                                        | This study                              | 9.9 T | 595 T  | 14.1 T |       |       |       |        |                |     |     |                      |                                                                      |            |       |       |        |       |       |       |        |                |     |   |                      |                                    |            |       |       |        |       |       |       |        |              |     |   |                     |                                    |            |       |       |        |       |       |       |        |              |     |
| 6.7 P                                                                            | 100 P                   | TEAOH     | NA                             | 1/1/0.5/2/65                                                                                                          | 400                       | 4                                                                        | N <sub>2</sub> 90%   | Hierarchical SAPO-34 using Organosilane                                                     | [14]       |        |       |           |        |                                                   |     |     |                      |                                                                    |            |        |       |        |        |       |           |              |                                                   |     |                    |                                                                      |                                         |            |        |       |        |        |       |           |                |                                                   |     |                      |                                                                      |                                         |            |        |       |        |       |       |           |                |                                                   |     |                      |                                                                      |                                         |       |        |       |       |       |       |        |                |              |     |                      |                                                                      |                                         |       |        |        |       |       |       |        |                |     |     |                      |                                                                      |            |       |       |        |       |       |       |        |                |     |   |                      |                                    |            |       |       |        |       |       |       |        |              |     |   |                     |                                    |            |       |       |        |       |       |       |        |              |     |
| 16.7 T                                                                           | 250 T                   |           |                                |                                                                                                                       |                           |                                                                          |                      |                                                                                             |            |        |       |           |        |                                                   |     |     |                      |                                                                    |            |        |       |        |        |       |           |              |                                                   |     |                    |                                                                      |                                         |            |        |       |        |        |       |           |                |                                                   |     |                      |                                                                      |                                         |            |        |       |        |       |       |           |                |                                                   |     |                      |                                                                      |                                         |       |        |       |       |       |       |        |                |              |     |                      |                                                                      |                                         |       |        |        |       |       |       |        |                |     |     |                      |                                                                      |            |       |       |        |       |       |       |        |                |     |   |                      |                                    |            |       |       |        |       |       |       |        |              |     |   |                     |                                    |            |       |       |        |       |       |       |        |              |     |
| 6.0 P                                                                            | 300 P                   | TEAOH     | 21 P                           | 1/1/0.6/2/40                                                                                                          | 400                       | 1.2                                                                      | N <sub>2</sub> 50%   | Hierarchical SAPO-34 using hexadecyltrimethylammonium bromide (CTAB)                        | [15]       |        |       |           |        |                                                   |     |     |                      |                                                                    |            |        |       |        |        |       |           |              |                                                   |     |                    |                                                                      |                                         |            |        |       |        |        |       |           |                |                                                   |     |                      |                                                                      |                                         |            |        |       |        |       |       |           |                |                                                   |     |                      |                                                                      |                                         |       |        |       |       |       |       |        |                |              |     |                      |                                                                      |                                         |       |        |        |       |       |       |        |                |     |     |                      |                                                                      |            |       |       |        |       |       |       |        |                |     |   |                      |                                    |            |       |       |        |       |       |       |        |              |     |   |                     |                                    |            |       |       |        |       |       |       |        |              |     |
| 8.4 T                                                                            | 420 T                   |           | 20 T                           |                                                                                                                       |                           |                                                                          |                      |                                                                                             |            | 4.0 P  | 120 P | TEA       | 9 P    | 1/1/0.33/4/100                                    | 450 | 2   | 50% H <sub>2</sub> O | Base-etching post treatment                                        | [16]       | 7.3 T  | 220 T | 9 T    | 3.0 P  | 180 P | TEA       | 9 P          | 1/1/0.4/3/50                                      | 400 | 1                  | 5% H <sub>2</sub> O                                                  | Citric acid-etching post treatment      | [17]       | 7.5 T  | 450 T | 11 T   | 6.7 P  | 400 P | TEAOH     | 15.1 P         | 1/1/0.4/2/70                                      | 400 | 1                    | 70% Ar                                                               | Alkali-etching post treatment           | This study | 9.9 T  | 595 T | 14.1 T |       |       |           |                |                                                   |     |                      |                                                                      |                                         |       |        |       |       |       |       |        |                |              |     |                      |                                                                      |                                         |       |        |        |       |       |       |        |                |     |     |                      |                                                                      |            |       |       |        |       |       |       |        |                |     |   |                      |                                    |            |       |       |        |       |       |       |        |              |     |   |                     |                                    |            |       |       |        |       |       |       |        |              |     |
| 4.0 P                                                                            | 120 P                   | TEA       | 9 P                            | 1/1/0.33/4/100                                                                                                        | 450                       | 2                                                                        | 50% H <sub>2</sub> O | Base-etching post treatment                                                                 | [16]       |        |       |           |        |                                                   |     |     |                      |                                                                    |            |        |       |        |        |       |           |              |                                                   |     |                    |                                                                      |                                         |            |        |       |        |        |       |           |                |                                                   |     |                      |                                                                      |                                         |            |        |       |        |       |       |           |                |                                                   |     |                      |                                                                      |                                         |       |        |       |       |       |       |        |                |              |     |                      |                                                                      |                                         |       |        |        |       |       |       |        |                |     |     |                      |                                                                      |            |       |       |        |       |       |       |        |                |     |   |                      |                                    |            |       |       |        |       |       |       |        |              |     |   |                     |                                    |            |       |       |        |       |       |       |        |              |     |
| 7.3 T                                                                            | 220 T                   |           | 9 T                            |                                                                                                                       |                           |                                                                          |                      |                                                                                             |            | 3.0 P  | 180 P | TEA       | 9 P    | 1/1/0.4/3/50                                      | 400 | 1   | 5% H <sub>2</sub> O  | Citric acid-etching post treatment                                 | [17]       | 7.5 T  | 450 T | 11 T   | 6.7 P  | 400 P | TEAOH     | 15.1 P       | 1/1/0.4/2/70                                      | 400 | 1                  | 70% Ar                                                               | Alkali-etching post treatment           | This study | 9.9 T  | 595 T | 14.1 T |        |       |           |                |                                                   |     |                      |                                                                      |                                         |            |        |       |        |       |       |           |                |                                                   |     |                      |                                                                      |                                         |       |        |       |       |       |       |        |                |              |     |                      |                                                                      |                                         |       |        |        |       |       |       |        |                |     |     |                      |                                                                      |            |       |       |        |       |       |       |        |                |     |   |                      |                                    |            |       |       |        |       |       |       |        |              |     |   |                     |                                    |            |       |       |        |       |       |       |        |              |     |
| 3.0 P                                                                            | 180 P                   | TEA       | 9 P                            | 1/1/0.4/3/50                                                                                                          | 400                       | 1                                                                        | 5% H <sub>2</sub> O  | Citric acid-etching post treatment                                                          | [17]       |        |       |           |        |                                                   |     |     |                      |                                                                    |            |        |       |        |        |       |           |              |                                                   |     |                    |                                                                      |                                         |            |        |       |        |        |       |           |                |                                                   |     |                      |                                                                      |                                         |            |        |       |        |       |       |           |                |                                                   |     |                      |                                                                      |                                         |       |        |       |       |       |       |        |                |              |     |                      |                                                                      |                                         |       |        |        |       |       |       |        |                |     |     |                      |                                                                      |            |       |       |        |       |       |       |        |                |     |   |                      |                                    |            |       |       |        |       |       |       |        |              |     |   |                     |                                    |            |       |       |        |       |       |       |        |              |     |
| 7.5 T                                                                            | 450 T                   |           | 11 T                           |                                                                                                                       |                           |                                                                          |                      |                                                                                             |            | 6.7 P  | 400 P | TEAOH     | 15.1 P | 1/1/0.4/2/70                                      | 400 | 1   | 70% Ar               | Alkali-etching post treatment                                      | This study | 9.9 T  | 595 T | 14.1 T |        |       |           |              |                                                   |     |                    |                                                                      |                                         |            |        |       |        |        |       |           |                |                                                   |     |                      |                                                                      |                                         |            |        |       |        |       |       |           |                |                                                   |     |                      |                                                                      |                                         |       |        |       |       |       |       |        |                |              |     |                      |                                                                      |                                         |       |        |        |       |       |       |        |                |     |     |                      |                                                                      |            |       |       |        |       |       |       |        |                |     |   |                      |                                    |            |       |       |        |       |       |       |        |              |     |   |                     |                                    |            |       |       |        |       |       |       |        |              |     |
| 6.7 P                                                                            | 400 P                   | TEAOH     | 15.1 P                         | 1/1/0.4/2/70                                                                                                          | 400                       | 1                                                                        | 70% Ar               | Alkali-etching post treatment                                                               | This study |        |       |           |        |                                                   |     |     |                      |                                                                    |            |        |       |        |        |       |           |              |                                                   |     |                    |                                                                      |                                         |            |        |       |        |        |       |           |                |                                                   |     |                      |                                                                      |                                         |            |        |       |        |       |       |           |                |                                                   |     |                      |                                                                      |                                         |       |        |       |       |       |       |        |                |              |     |                      |                                                                      |                                         |       |        |        |       |       |       |        |                |     |     |                      |                                                                      |            |       |       |        |       |       |       |        |                |     |   |                      |                                    |            |       |       |        |       |       |       |        |              |     |   |                     |                                    |            |       |       |        |       |       |       |        |              |     |
| 9.9 T                                                                            | 595 T                   |           | 14.1 T                         |                                                                                                                       |                           |                                                                          |                      |                                                                                             |            |        |       |           |        |                                                   |     |     |                      |                                                                    |            |        |       |        |        |       |           |              |                                                   |     |                    |                                                                      |                                         |            |        |       |        |        |       |           |                |                                                   |     |                      |                                                                      |                                         |            |        |       |        |       |       |           |                |                                                   |     |                      |                                                                      |                                         |       |        |       |       |       |       |        |                |              |     |                      |                                                                      |                                         |       |        |        |       |       |       |        |                |     |     |                      |                                                                      |            |       |       |        |       |       |       |        |                |     |   |                      |                                    |            |       |       |        |       |       |       |        |              |     |   |                     |                                    |            |       |       |        |       |       |       |        |              |     |

\* Methanol processing ability =  $WHSV (g_{MeOH} g_{cat}^{-1} h^{-1}) \times (\text{time taken to go down to 95\% MeOH conversion (h)})$

\* until 95% methanol conversion, "P" stand for parent catalyst and "T" stands for treated or modified sample

## References

- [1] Q. Sun, N. Wang, R. Bai, X. Chen, J. Yu, Seeding induced nano-sized hierarchical SAPO-34 zeolites: Cost-effective synthesis and superior MTO performance, *J. Mater. Chem. A*. 4 (2016) 14978–14982. <https://doi.org/10.1039/c6ta06613e>.
- [2] M. Yang, P. Tian, C. Wang, Y. Yuan, Y. Yang, S. Xu, Y. He, Z. Liu, A top-down approach to prepare silicoaluminophosphate molecular sieve nanocrystals with improved catalytic activity, *Chem. Commun.* 50 (2014) 1845–1847. <https://doi.org/10.1039/C3CC48264B>.
- [3] M. Li, Y. Wang, L. Bai, N. Chang, G. Nan, D. Hu, Y. Zhang, W. Wei, Solvent-free synthesis of SAPO-34 nanocrystals with reduced template consumption for methanol-to-olefins process, *Appl. Catal. A Gen.* 531 (2017) 203–211. <https://doi.org/10.1016/j.apcata.2016.11.005>.
- [4] T. Álvaro-Muñoz, E. Sastre, C. Márquez-Álvarez, Microwave-assisted synthesis of plate-like SAPO-34 nanocrystals with increased catalyst lifetime in the methanol-to-olefin reaction, *Catal. Sci. Technol.* 4 (2014) 4330–4339. <https://doi.org/10.1039/C4CY00775A>.
- [5] S. Askari, R. Halladj, M. Sohrabi, Methanol conversion to light olefins over sonochemically prepared SAPO-34 nanocatalyst, *Microporous Mesoporous Mater.* 163 (2012) 334–342. <https://doi.org/10.1016/j.micromeso.2012.07.041>.
- [6] Q. Sun, N. Wang, D. Xi, M. Yang, J. Yu, Organosilane surfactant-directed synthesis of hierarchical porous SAPO-34 catalysts with excellent MTO performance, *Chem. Commun.* 50 (2014) 6502–6505. <https://doi.org/10.1039/c4cc02050b>.
- [7] C. Wang, M. Yang, P. Tian, S. Xu, Y. Yang, D. Wang, Y. Yuan, Z. Liu, Dual template-directed synthesis of SAPO-34 nanosheet assemblies with improved stability in the methanol to olefins reaction, *J. Mater. Chem. A*. 3 (2015) 5608–5616. <https://doi.org/10.1039/c4ta06124a>.
- [8] F. Schmidt, S. Paasch, E. Brunner, S. Kaskel, Carbon templated SAPO-34 with improved adsorption kinetics and catalytic performance in the MTO-reaction, *Microporous Mesoporous Mater.* 164 (2012) 214–221. <https://doi.org/10.1016/j.micromeso.2012.04.045>.
- [9] X. Chen, D. Xi, Q. Sun, N. Wang, Z. Dai, D. Fan, V. Valtchev, J. Yu, A top-down approach to hierarchical SAPO-34 zeolites with improved selectivity of olefin, (2016). <https://doi.org/10.1016/j.micromeso.2016.07.045>.
- [10] Y.R. He, Y.L. Zhu, Y. Duan, M. Zhang, J. Jiang, Green Route to Grow Hierarchical SAPO-34 Crystal with Excellent Catalytic Performance in Methanol to Olefin Reaction, *Cryst. Growth Des.* 20 (2020) 17–23. <https://doi.org/10.1021/acs.cgd.9b01257>.
- [11] G. Yang, Y. Wei, S. Xu, J. Chen, J. Li, Z. Liu, J. Yu, R. Xu, Nanosize-Enhanced Lifetime of SAPO-34 Catalysts in Methanol-to-Olefin Reactions, *J. Phys. Chem. C*. 117 (2013) 8214–8222. <https://doi.org/10.1021/JP312857P>.
- [12] T. Álvaro-Muñoz, E. Sastre, C. Márquez-Álvarez, Microwave-assisted synthesis of plate-like SAPO-34 nanocrystals with increased catalyst lifetime in the methanol-to-olefin reaction, *Catal. Sci. Technol.* 4 (2014) 4330–4339. <https://doi.org/10.1039/C4CY00775A>.
- [13] Q. Sun, N. Wang, R. Bai, X. Chen, J. Yu, Seeding induced nano-sized hierarchical SAPO-34 zeolites: cost-effective synthesis and superior MTO performance, *J. Mater. Chem. A*. 4 (2016) 14978–14982. <https://doi.org/10.1039/C6TA06613E>.
- [14] B. Yang, P. Zhao, J. Ma, R. Li, Synthesis of hierarchical SAPO-34 nanocrystals with improved catalytic

performance for methanol to olefins, *Chem. Phys. Lett.* 665 (2016) 59–63.  
<https://doi.org/10.1016/j.cplett.2016.10.052>.

- [15] T. Álvaro-Muñoz, C. Márquez-Álvarez, E. Sastre, Enhanced stability in the methanol-to-olefins process shown by SAPO-34 catalysts synthesized in biphasic medium, in: *Catal. Today*, 2013: pp. 208–215.  
<https://doi.org/10.1016/j.cattod.2013.03.015>.
- [16] Y.L. Zhu, H. Dai, Y. Duan, Q. Chen, M. Zhang, Excellent Methanol to Olefin Performance of SAPO-34 Crystal Deriving from the Mixed Micropore, Mesopore, and Macropore Architecture, *Cryst. Growth Des.* 20 (2020) 2623–2631. <https://doi.org/10.1021/ACS.CGD.0C00002>.
- [17] T. Zheng, H. Liu, P. He, R. Zhang, X. Meng, C. Xu, H. Liu, Y. Yue, Z. Liu, Post synthesis of hierarchical SAPO-34 via citric acid etching: Mechanism of selective desilication, *Microporous Mesoporous Mater.* 335 (2022) 111798. <https://doi.org/10.1016/J.MICROMESO.2022.111798>.
